# Supplementary material for: A comparative study in single- and binary-contaminant systems: the photodegradation of tetracycline and imidacloprid on flower-shaped Ag/AgBr/BiOBr under visible-light irradiation
Source: Royal Society of Chemistry journal article supplement (doi:10.1039/d0nj02549f), 2020-01-01
Supplement: d0nj02549f1.pdf [file d0nj02549f1.pdf]

**Comparative study in single- and binary-contaminant systems:  
Photodegradation of tetracycline and imidacloprid on flower-  
shaped Ag/AgBr/BiOBr under visible-light irradiation**

**Jingjing Zhang<sup>a</sup>, Jingtao Dai<sup>a</sup>, Jian Chen<sup>ab\*</sup>**

<sup>a</sup> College of Chemistry and Environmental Engineering, Yancheng Teachers University, 2  
Xiwang South Road, Yancheng 224007, Jiangsu, People's Republic of China;

<sup>b</sup> Department of Geography and Resource Management, The Chinese University of Hong  
Kong, Shatin, N.T., Hong Kong, People's Republic of China.

□ Corresponding author: Jian Chen

E-mail: chenj01@yctu.edu.cn

Tel/Fax: +86-515-88233180

**Journal title: New Journal of Chemistry**

† Electronic supplementary information

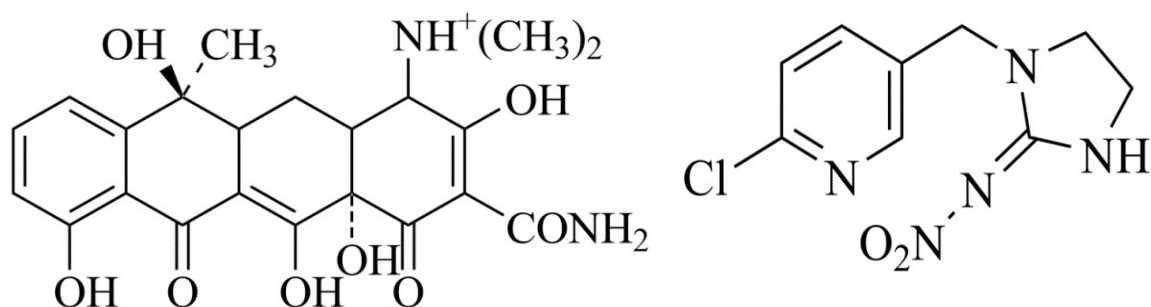

**Fig. S1** Chemical structure of tetracycline (left) and imidacloprid (right)

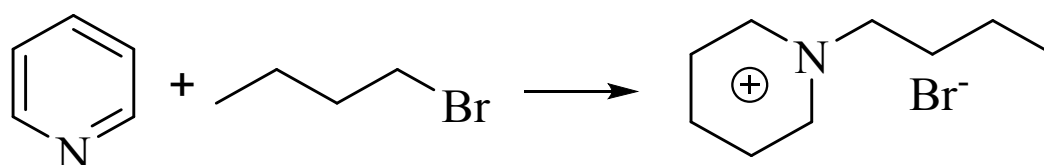

**<sup>1</sup>H NMR** (400 MHz, D<sub>2</sub>O):

0.81~0.85 (t, 3H), 1.2~1.3 (m, 2H), 1.85~1.93 (m, 2H), 4.48~4.52 (t, 1H),  
7.93~7.97 (t, 2H), 8.41~8.45 (m, 1H), 8.73~8.75 (d, 2H).

**FT-IR:**

3427, 3146, 3087, 2961, 2935, 2874, 1635, 1571, 1465, 1381, 1338, 1168,  
840, 753 cm<sup>-1</sup>.

**Melting point:** 105-106 °C

**Scheme S1** Synthesis and characterization of [Bpy]Br Ionic liquid

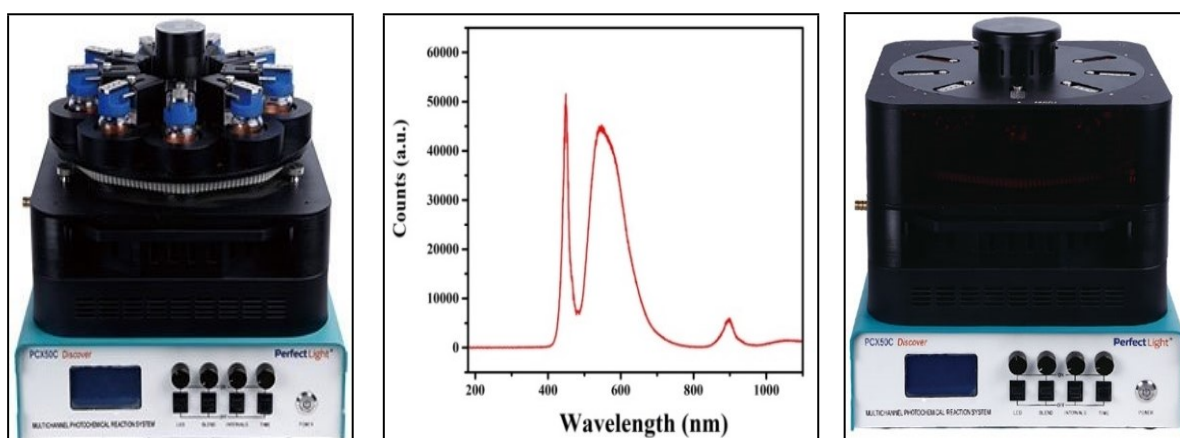

**Fig. S2** Multichannel photocatalytic reactor (PCX50C Discover, Beijing Perfectlight Science and Technology Co., Ltd., Beijing, China) and its emission spectrum

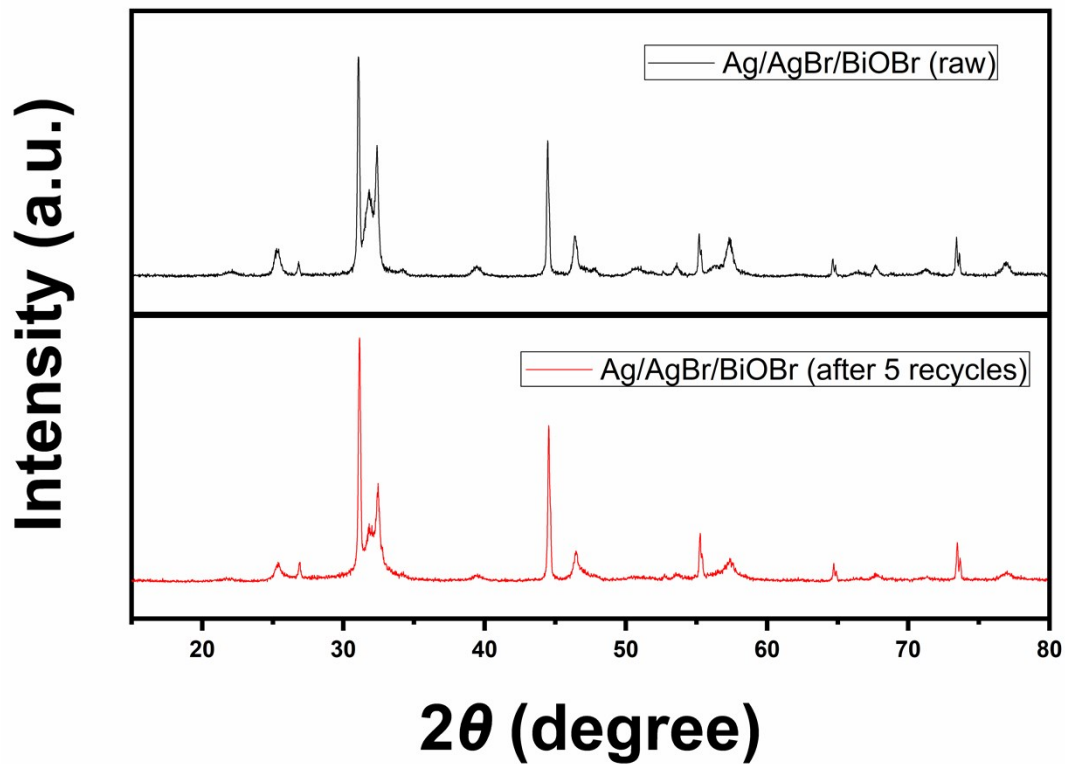

**Fig. S3** XRD patterns of raw and recycled Ag/AgBr/BiOBr

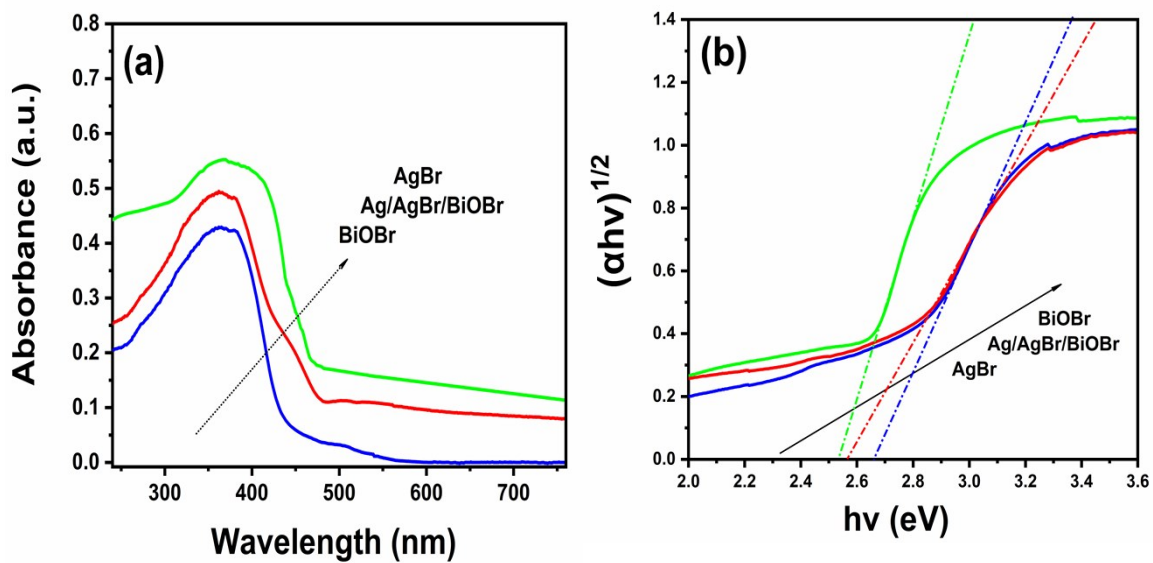

Fig. S4 UV-Vis DRS (a) and the Tauc plots of as-prepared catalysts (b)

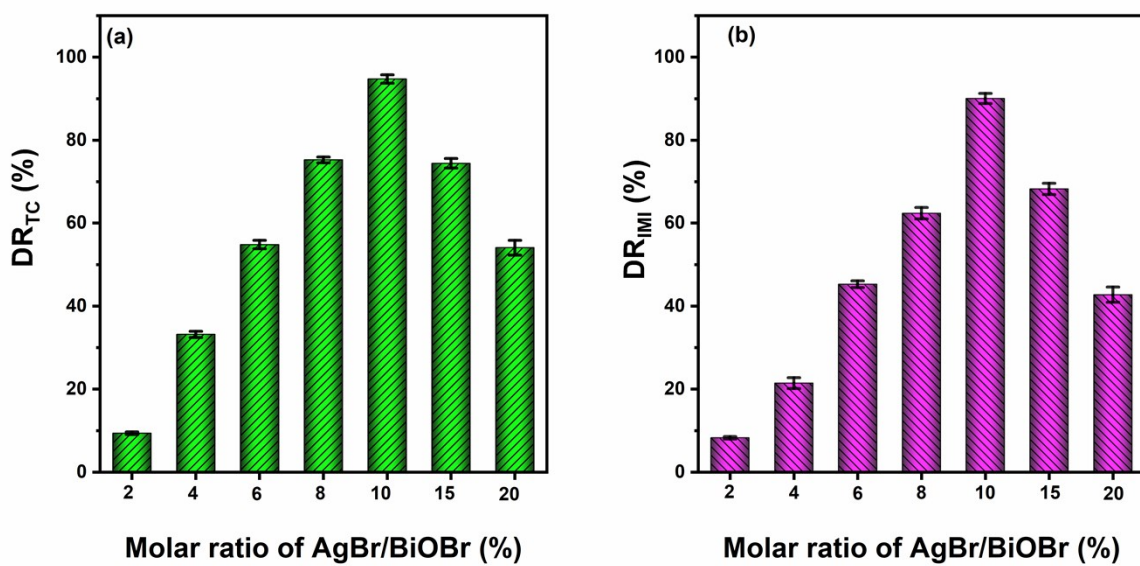

Fig. S5 Effect from molar ratio of AgBr/BiOBr on TC (a) and IMI (b) photo-degradation ( $C_0$ , 10  $\mu$ M;  $pH_0$ , 4.5; catalyst dosage, 1 g/L)

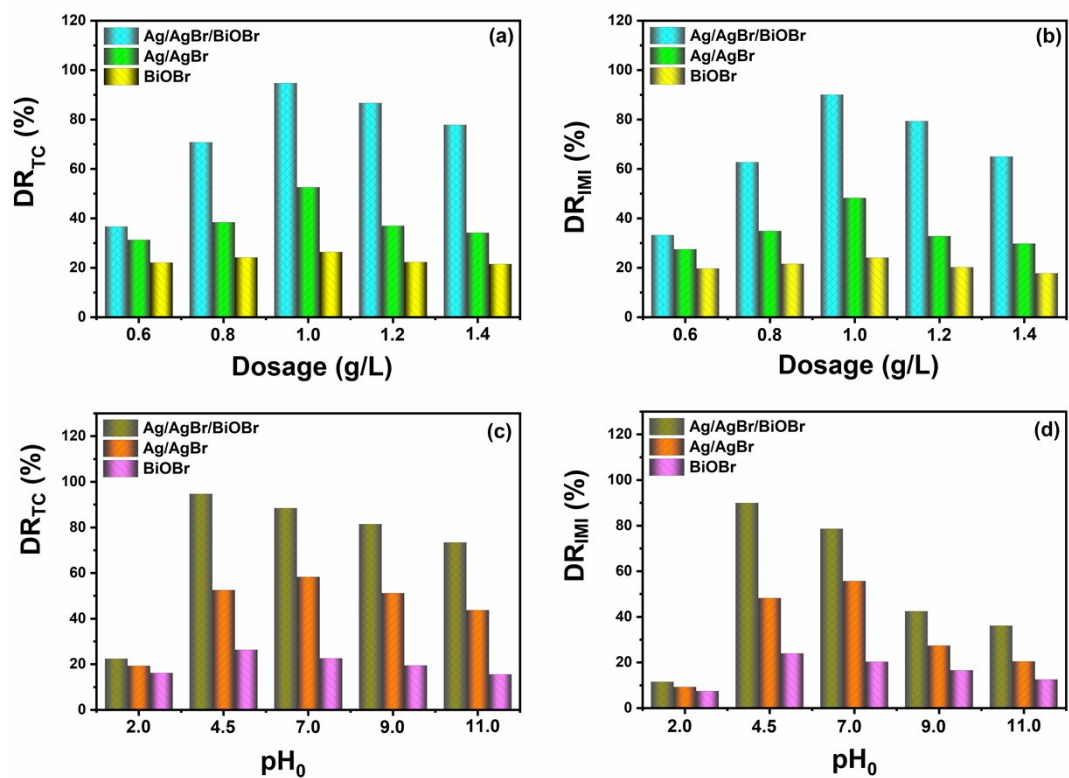

**Fig. S6** Photocatalytic degradation of TC/IMI ( $C_0$ , 10  $\mu\text{M}$ ) over the as-prepared catalysts (a/b: pH<sub>0</sub>, 4.5; c/d: catalyst dosage, 1 g/L)

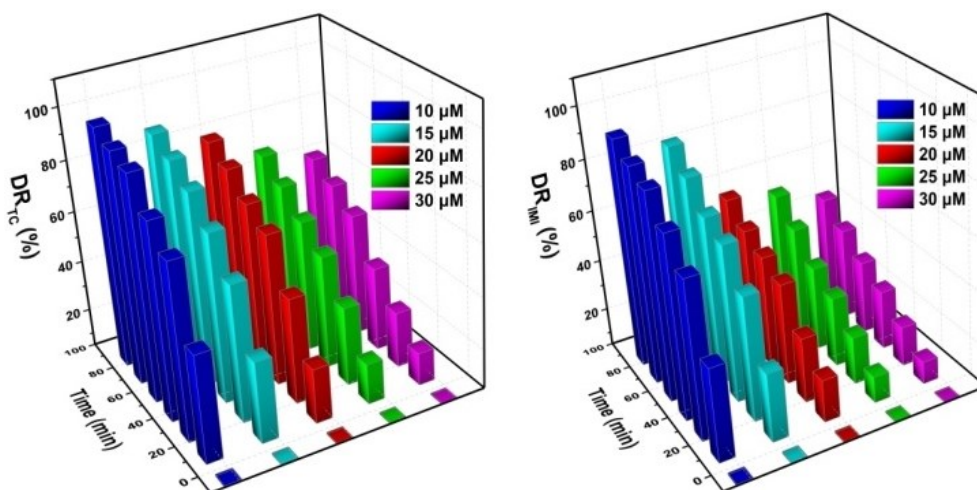

**Fig. S7** Effect from  $C_0$  on the photo-degradation (pH<sub>0</sub>, 4.5; catalyst dosage, 1 g/L)

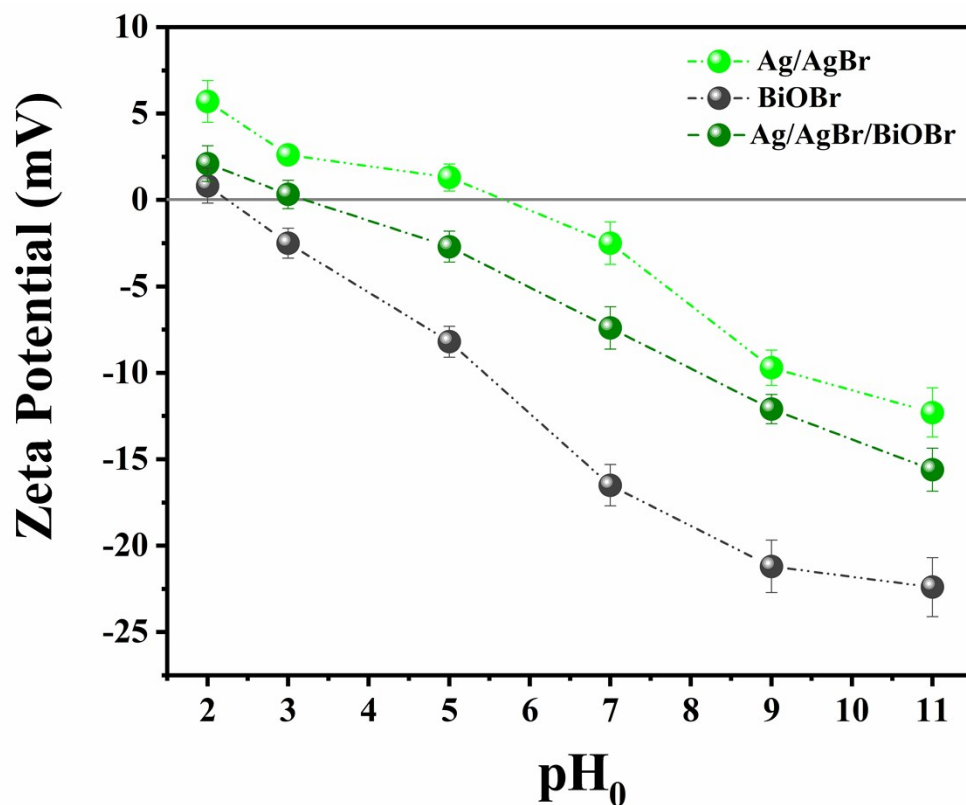

**Fig. S8** Zeta potential of as-prepared catalysts as function of pH (ionic strength, 0.01 M; dosage, 1 g/L)

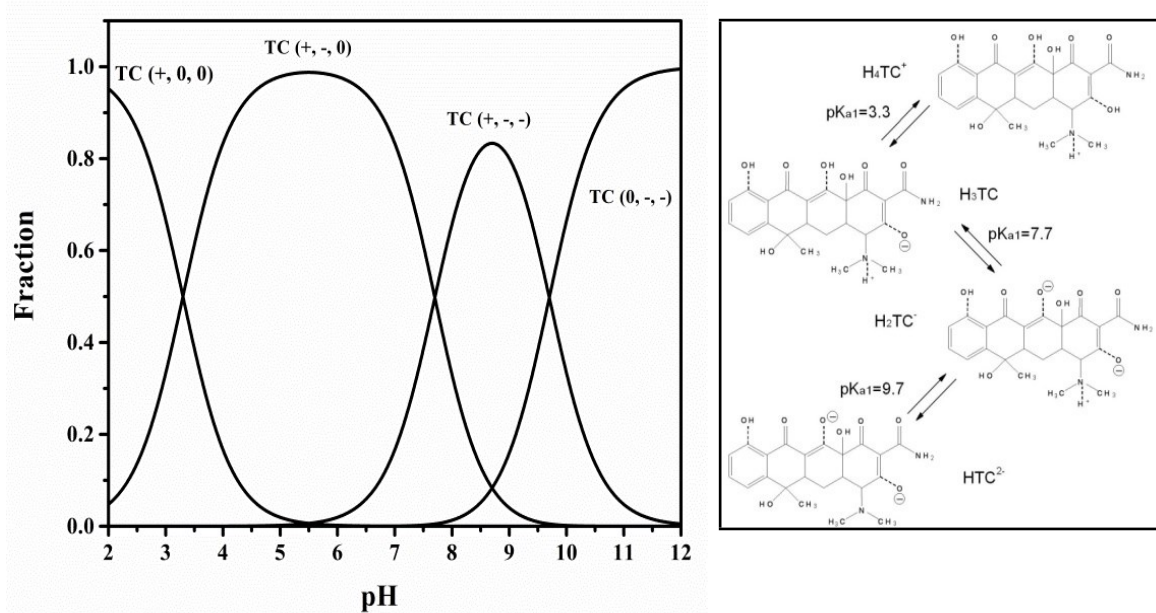

**Fig. S9** TC's species distribution (left) and transformation (right) over pH
